# Supplementary material for: Thiol-Ene Coupling of High Oleic Sunflower Oil towards Application in the Modification of Flexible Polyurethane Foams
Source: MDPI journal article supplement (doi:10.3390/ma15020628), 2022-01-14
Supplement: s1 [file s1]

Supplementary Information

**Table S1.** Fatty acid composition in HOSO.

| Fatty Acid                     |                  | (mol%) |
|--------------------------------|------------------|--------|
| C14:0 <sup>a</sup>             | myristic acid    | 0.1    |
| C16:0                          | palmitic acid    | 4.1    |
| C16:1 $\Delta$ 9c <sup>b</sup> | palmitoleic acid | 0.06   |
| C18:0                          | stearic acid     | 3.3    |
| C18:1 $\Delta$ 9c              | oleic acid       | 85.0   |
| C18:2 $\Delta$ 9c, 12c         | linoleic acid    | 6.0    |
| C20:0                          | arachidic acid   | 0.3    |
| C20:1 $\Delta$ 9c              | gadoleic acid    | 0.3    |
| C22:0                          | behenic acid     | 0.9    |

<sup>a</sup> C14:0 – number of carbon atoms : number of unsaturated double bonds.

<sup>b</sup> 9c – *cis* isomer of fatty acid (double bond at 9th carbon atom).

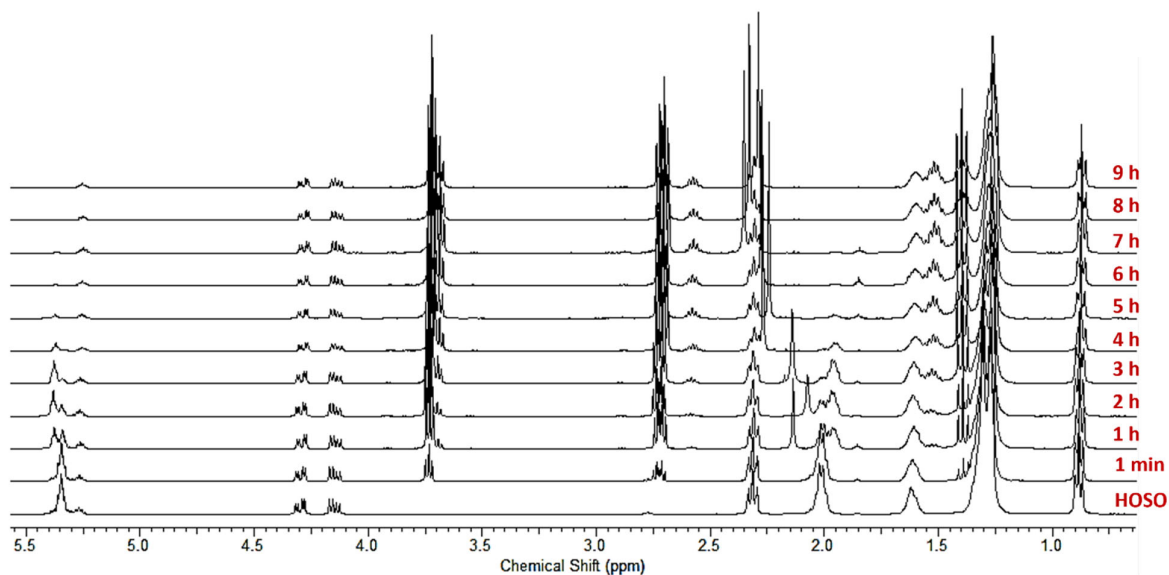

**Figure S1.** <sup>1</sup>H NMR spectra of thiol-ene coupling of HOSO.

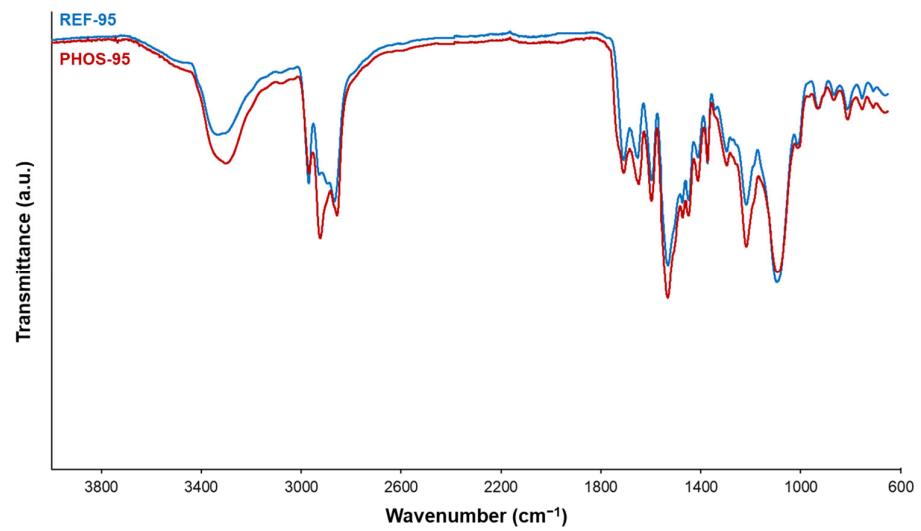

Figure S2. FT-IR spectra of reference foam (REF-95) and foam modified with PHOSO polyol (PHOS-95).
